# Supplementary material for: Boosting broadband short-wave infrared emission to achieve near-unity quantum efficiency via bridging Cr3+–Ni2+ in spinel solid-solutions towards light-emitting diode applications
Source: Royal Society of Chemistry journal article supplement (doi:10.1039/d3dt04271e), 2024-01-01
Supplement: d3dt04271e1.pdf [file d3dt04271e1.pdf]

**Boosting broadband short-wave infrared emission to near-unity quantum efficiency via bridging Cr<sup>3+</sup>-Ni<sup>2+</sup> in spinel solid-solutions towards light-emitting diode applications**

Geng Chen<sup>1</sup>, Lifang Yuan<sup>2,\*</sup>, Chaoyue Peng<sup>1</sup>, Haoyi Wu<sup>1</sup>, Yahong Jin<sup>1,\*</sup>

<sup>1</sup> School of Physics and Optoelectronic Engineering, Guangdong University of Technology, WaiHuan Xi Road, No. 100, Guangzhou 510006, China.

<sup>2</sup> School of Electronics and Communications, Guangdong Mechanical & Electrical Polytechnic, Guangzhou 510515, China.

Corresponding author:

E-mail: ylf121382@163.com (L. Y.), yhjin@gdut.edu.cn (Y. J.)

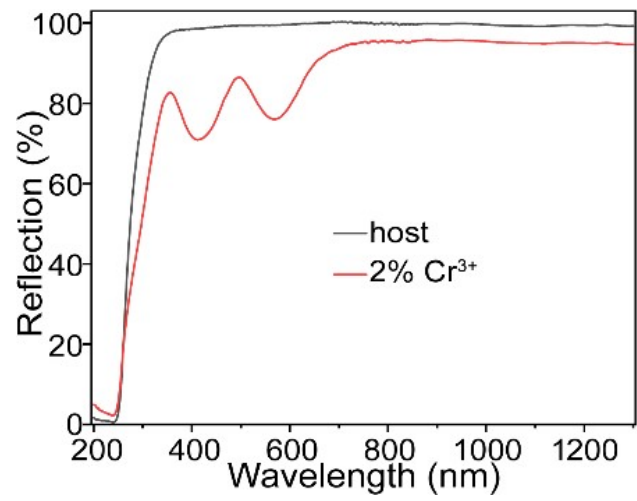

Fig. S1. DRS of  $\text{Mg}_{0.5}\text{Zn}_{0.5}\text{Ga}_2\text{O}_4$  and  $\text{Mg}_{0.5}\text{Zn}_{0.5}\text{Ga}_2\text{O}_4:2\% \text{Cr}^{3+}$ .

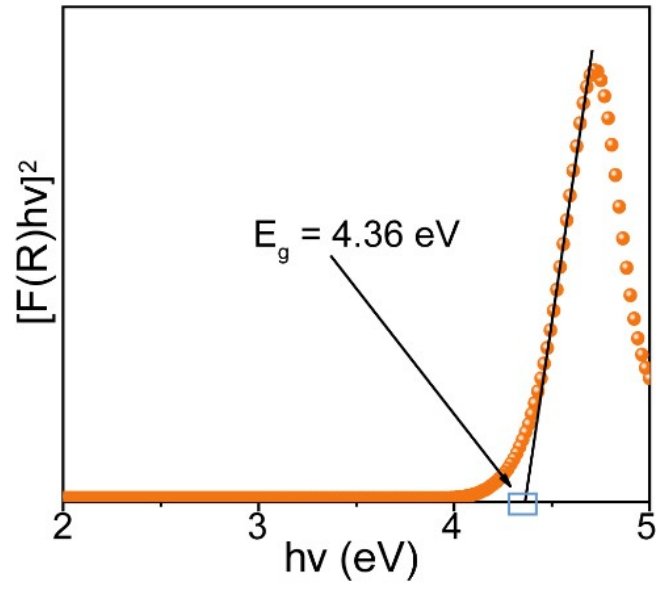

Fig. S2. Direct optical band gap of  $\text{Mg}_{0.5}\text{Zn}_{0.5}\text{Ga}_2\text{O}_4$  host.

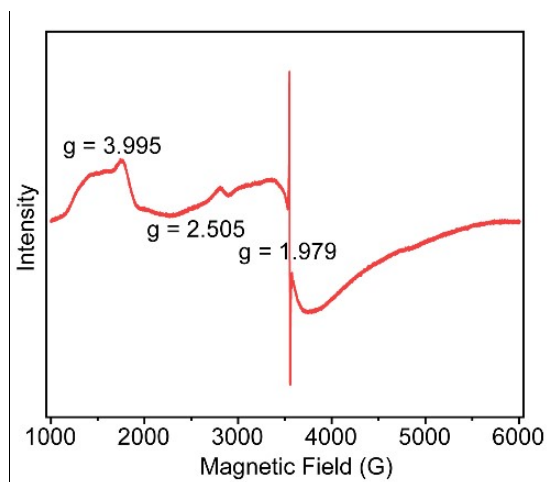

Fig. S3. EPR spectrum of  $\text{Mg}_{0.5}\text{Zn}_{0.5}\text{Ga}_2\text{O}_4:2\%\text{Cr}^{3+}$ .

The signals in the EPR spectrum correspond to different types of  $\text{Cr}^{3+}$ . Specifically,  $g = 3.995$  and  $g = 2.505$  denote the isolated  $\text{Cr}^{3+}$  ions, while  $g = 1.979$  signifies the presence of  $\text{Cr}^{3+}$ - $\text{Cr}^{3+}$  ion pairs.

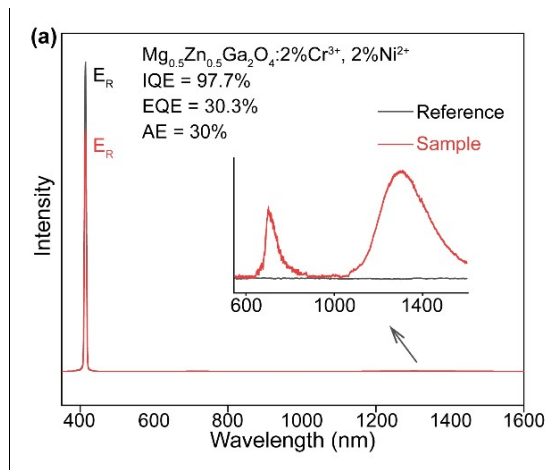

Fig. S4. Quantum efficiency measurement of  $\text{Mg}_{0.5}\text{Zn}_{0.5}\text{Ga}_2\text{O}_4:2\% \text{Cr}^{3+}, 2\% \text{Ni}^{2+}$ .
